# Supplementary material for: Insights into the Photoelectrocatalytic Behavior of gCN-Based Anode Materials Supported on Ni Foams
Source: MDPI journal article supplement (doi:10.3390/nano13061035), 2023-03-13
Supplement: s1 [file s1]

## Supporting Materials

# Insights into the Photoelectrocatalytic Behavior of gCN-Based Anode Materials Supported on Ni Foams

Serge Benedoue <sup>1,2</sup>, Mattia Benedet <sup>1</sup>, Alberto Gasparotto <sup>1,3,\*</sup>, Nicolas Gauquelin <sup>4</sup>,  
Andrey Orekhov <sup>4</sup>, Johan Verbeeck <sup>4</sup>, Roberta Seraglia <sup>3</sup>, Gioele Pagot <sup>5</sup>, Gian Andrea Rizzi <sup>1,3,\*</sup>,  
Vincenzo Balzano <sup>6</sup>, Luca Gavioli <sup>6</sup>, Vito Di Noto <sup>5</sup>, Davide Barreca <sup>3</sup> and Chiara Maccato <sup>1,3</sup>

<sup>1</sup> Department of Chemical Sciences, Padova University and INSTM, 35131 Padova, Italy; benedoueserge@yahoo.com (S.B.); mattia.benedet@phd.unipd.it (M.B.); chiara.maccato@unipd.it (C.M.); alberto.gasparotto@unipd.it (A.G.); gianandrea.rizzi@unipd.it (G.A.R.)

<sup>2</sup> Laboratory of Applied Physical and Analytical Chemistry, Department of Inorganic Chemistry, Faculty of Science, University of Yaounde1, Yaoundé P.O. Box 812, Cameroon

<sup>3</sup> CNR-ICMATE and INSTM, Department of Chemical Sciences, Padova University, 35131 Padova, Italy; roberta.seraglia@cnr.it (R.S.); davide.barreca@unipd.it (D.B.)

<sup>4</sup> EMAT and NANOLab Center of Excellence, University of Antwerp, 2020 Antwerpen, Belgium; nicolas.gauquelin@uantwerpen.be (N.G.); andrey.orekhov@uantwerpen.be (A.O.); jo.verbeeck@uantwerpen.be (J.V.)

<sup>5</sup> Section of Chemistry for the Technology (ChemTech), Department of Industrial Engineering, University of Padova and INSTM, 35131 Padova, Italy; gioele.pagot@unipd.it (G.P.); vito.dinoto@unipd.it (V.D.N.)

<sup>6</sup> Interdisciplinary Laboratories for Advanced Materials Physics (i-LAMP), Dipartimento di Matematica e Fisica, Università Cattolica del Sacro Cuore, 25133 Brescia, Italy; vincenzo.balzano@unicatt.it (V.B.); luca.gavioli@unicatt.it (L.G.).

\* Correspondence: alberto.gasparotto@unipd.it, gianandrea.rizzi@unipd.it;  
Tel.: +39-0498275192 (A.G.); +39-0498275722 (G.A.R.).

## S1. Experimental details

### S1.1. Synthesis

gCN<sup>Ar</sup> powders were synthesized by thermal condensation of melamine (99%, Sigma-Aldrich) in an Ar atmosphere [1]. Briefly, melamine powders were introduced in a closed crucible, placed in a tubular oven and then heated with a constant rate of 3°C/min at 100°C (30 min), 400°C (2.5 h), and finally 550°C (4 h), followed by slow cooling at room temperature. The preparation of gCN<sup>air</sup> powders was carried out in a similar way, but operating in air in a muffle furnace. In this case, melamine powders (typically 3 g) were transferred into a closed crucible and heated at a rate of 3°C/min at 100°C (30 min), 400°C (2 h), and then 550°C (4 h), followed by cooling at room temperature.

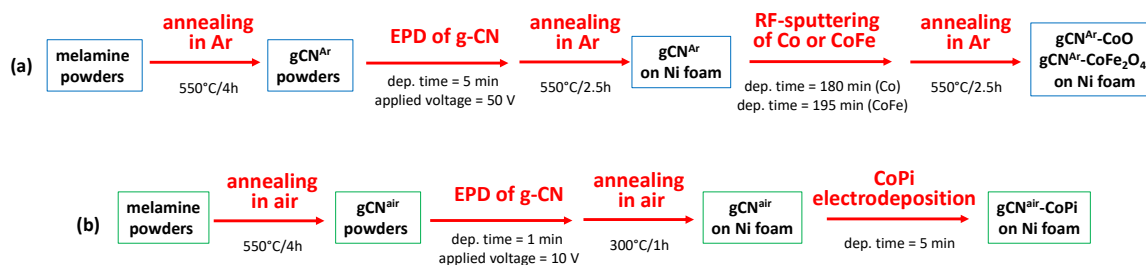

**Figure S1.** Synthetic protocols used for the preparation of: (a) gCN<sup>Ar</sup> and (b) gCN<sup>air</sup> powders, and the corresponding Ni foam-supported samples. The most relevant parameters are also reported.

### S1.2. Characterization

High-resolution electron energy loss spectroscopy (EELS) data were acquired on a state-of-the-art double-corrected and monochromated Thermo Fisher Scientific Titan 80-300 microscope operated at 120 kV to limit beam damage while keeping a sub-nm spatial resolution and an energy resolution of 120 meV, a convergence angle of 19 mrad and a collection angle of 90 mrad. EELS spectra were acquired on a Direct detection Gatan K2 camera mounted on a GIF Quantum spectrometer. Dual EELS was used to get absolute energy of the Co *L*, O *K* and Fe *L* edges. EELS data were acquired with 0.2 s/pixel and 0.1 eV/pixel dispersion. High-resolution STEM images were acquired at 300 kV acceleration voltage using a convergence semi-angle  $\alpha$  of 21 mrad, 50 pA probe current and a collection angle of 29-160 mrad for high angle annular dark field (HAADF) imaging, and 0-20 mrad for bright field imaging (BF). Image processing was performed using an open source HyperSpy Python software package [2]. Simulated electron diffraction data as well as high-resolution STEM images were calculated using the JEMS software [3].

## S2. Chemico-physical characterization

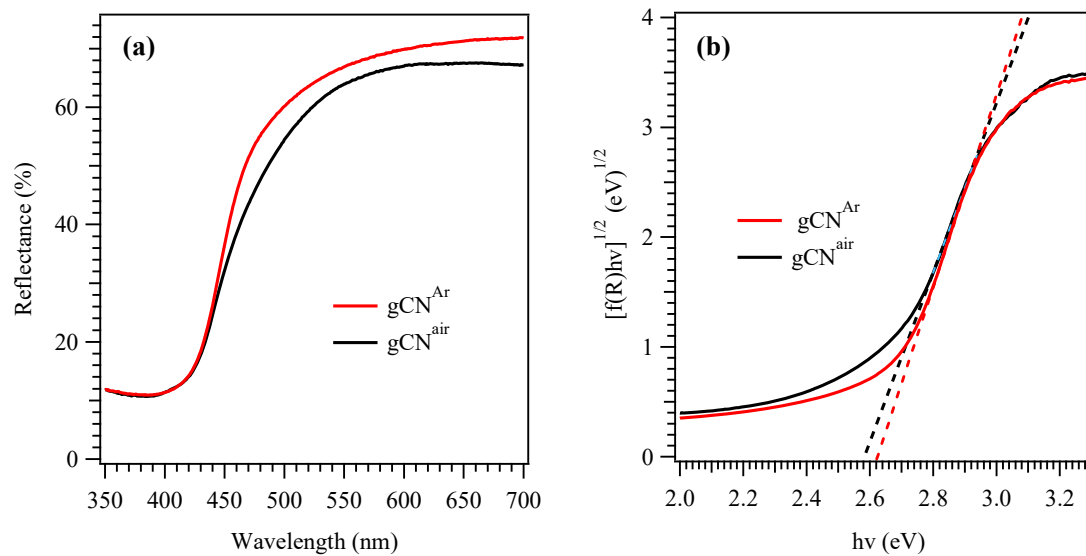

**Figure S2.** (a) Diffuse reflectance spectrum and (b) corresponding Tauc plot for  $\text{gCN}^{\text{air}}$  powders.

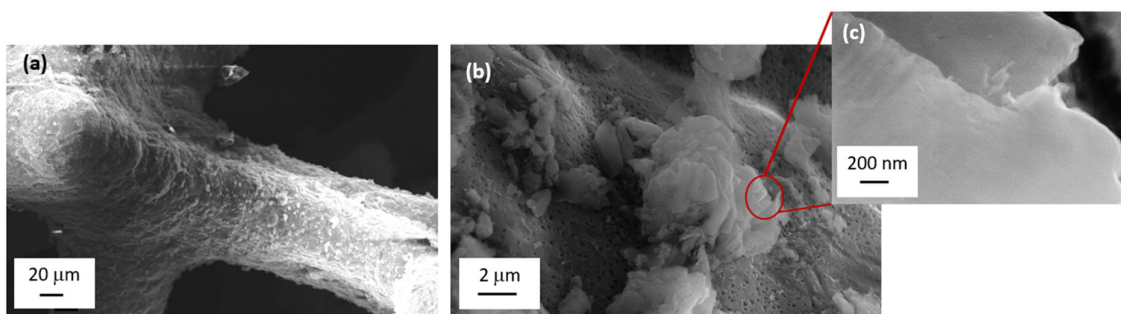

**Figure S3.** FE-SEM micrographs at different magnification levels for sample  $\text{gCN}^{\text{Ar}}$ .

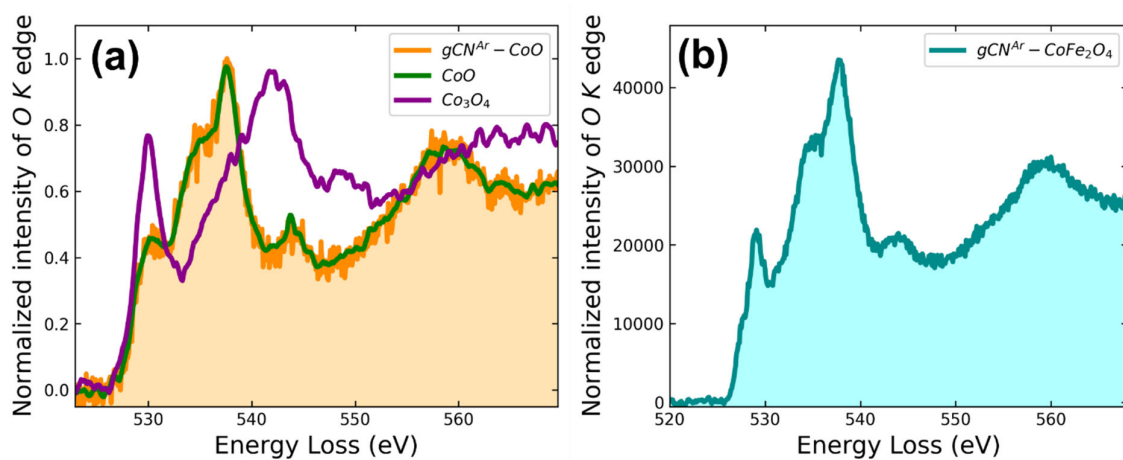

**Figure S4.** (a) O K edge EELS spectrum acquired on a Co-containing nanoparticle (orange) for gCN<sup>Ar</sup>-CoO, compared to reference spectra taken on powders of CoO (green) and Co<sub>3</sub>O<sub>4</sub> (purple). (b) EELS spectrum of the O K edge collected on specimen gCN-CoFe<sub>2</sub>O<sub>4</sub>.

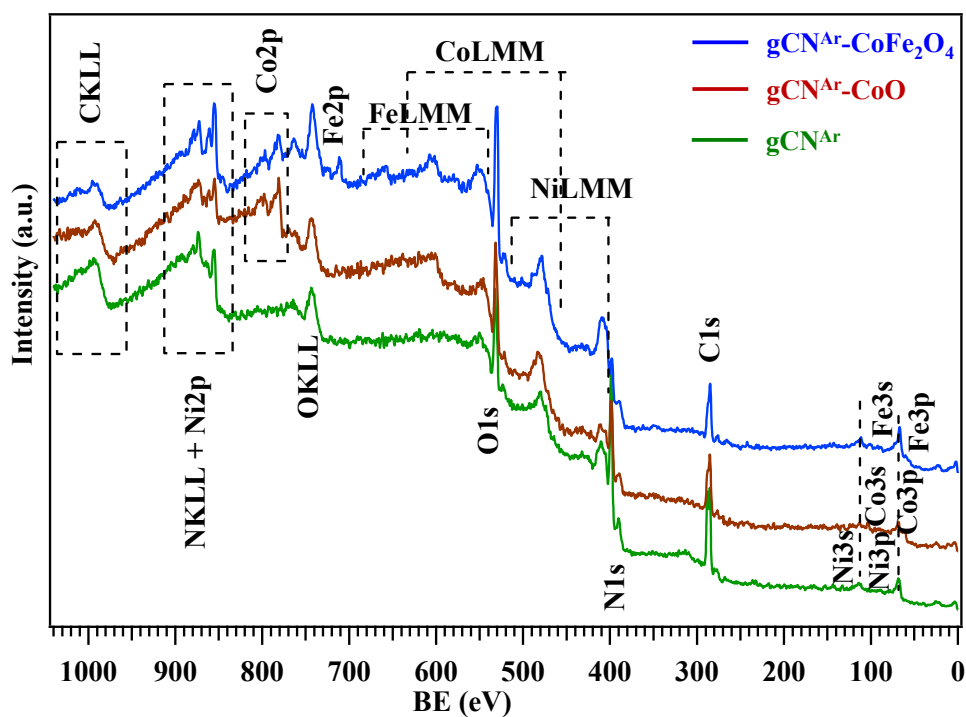

**Figure S5.** Wide-scan XPS spectra of gCN<sup>Ar</sup> deposits before and after functionalization with CoO and CoFe<sub>2</sub>O<sub>4</sub>. Quantitative analyses yielded the following atomic percentage ratios: N/C = 1.0, 0.8 and 0.7, for gCN<sup>Ar</sup>, gCN<sup>Ar</sup>-CoO and gCN<sup>Ar</sup>-CoFe<sub>2</sub>O<sub>4</sub>; Co/N = 0.20, for both gCN<sup>Ar</sup>-CoO and gCN<sup>Ar</sup>-CoFe<sub>2</sub>O<sub>4</sub>; Fe/N = 0.41, for gCN<sup>Ar</sup>-CoFe<sub>2</sub>O<sub>4</sub>; Co/Fe = 0.50, for gCN<sup>Ar</sup>-CoFe<sub>2</sub>O<sub>4</sub>. Co atomic percentage (at.%) values were estimated to be 7.0 and 4.0 % for gCN<sup>Ar</sup>-CoO and gCN<sup>Ar</sup>-CoFe<sub>2</sub>O<sub>4</sub>, respectively. Calculation was performed excluding the adventitious carbon component.

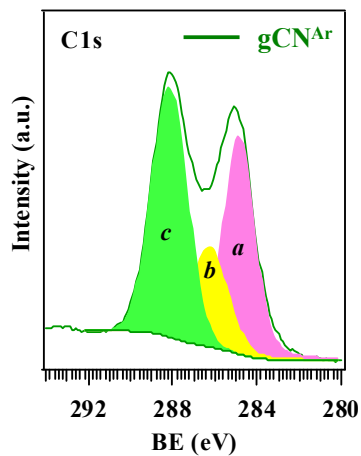

**Figure S6.** C1s peaks for bare gCN<sup>Ar</sup> supported on Ni foam.

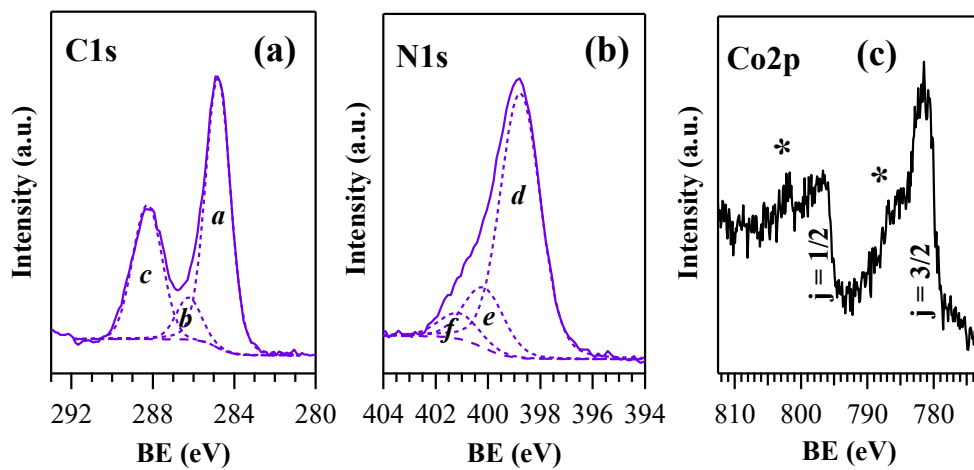

**Figure S7.** C1s (a) and N1s (b) photopeaks for gCN<sup>air</sup> along with Co2p (c) signal for gCN<sup>air</sup>-CoPi. In (c), stars (\*) indicate shake-up peaks. Co atomic percentage (at.%) was estimated to be 2.0 %. Calculation was performed excluding the adventitious carbon component.

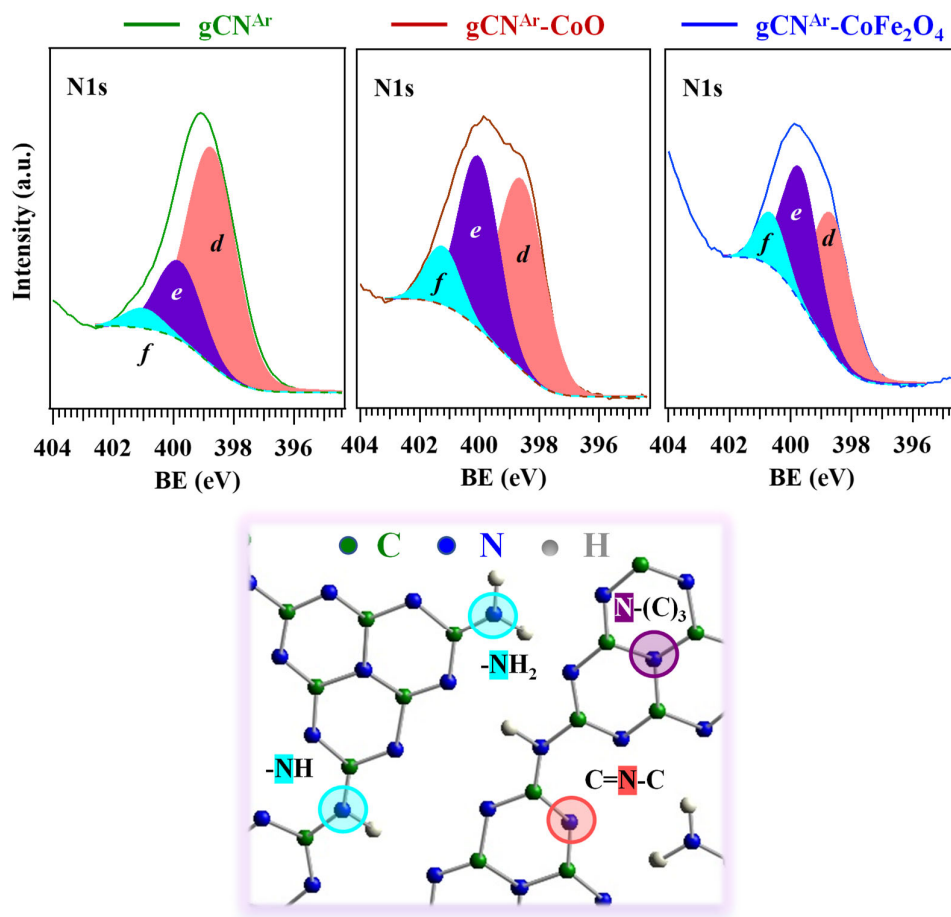

**Figure S8.** Top panel: N1s photopeaks for gCN<sup>Ar</sup> deposits on Ni foams before and after functionalization with CoO and CoFe<sub>2</sub>O<sub>4</sub>. Bottom panel: Schematic representation of gCN structure [4], in which non-equivalent N sites are marked. Color codes as in top panel.

The N1s signals resulted from three contributing bands (Figures S7b and S8, top panel): *d*, the predominant one, due to attributable to N centers in C=N-C moieties (BE = 398.6 eV), [4-12]; *e*, ascribed to tri-coordinated N atoms in N-(C)<sub>3</sub> moieties (BE = 399.8 eV) [8,13-20]; *f*, due to carbon atoms in uncondensed C-NH<sub>x</sub> (x = 1, 2) groups on gCN ring edges (BE = 401.0 eV) [9,10,13-15,17,19] (see Figure S8, bottom panel). The percentage contribution of component *f* to the overall N1s signal was evaluated to be 4.9, 11.0, and 12.4 % for gCN<sup>Ar</sup>, gCN<sup>Ar</sup>-CoO, and gCN<sup>Ar</sup>-CoFe<sub>2</sub>O<sub>4</sub> specimens, respectively.

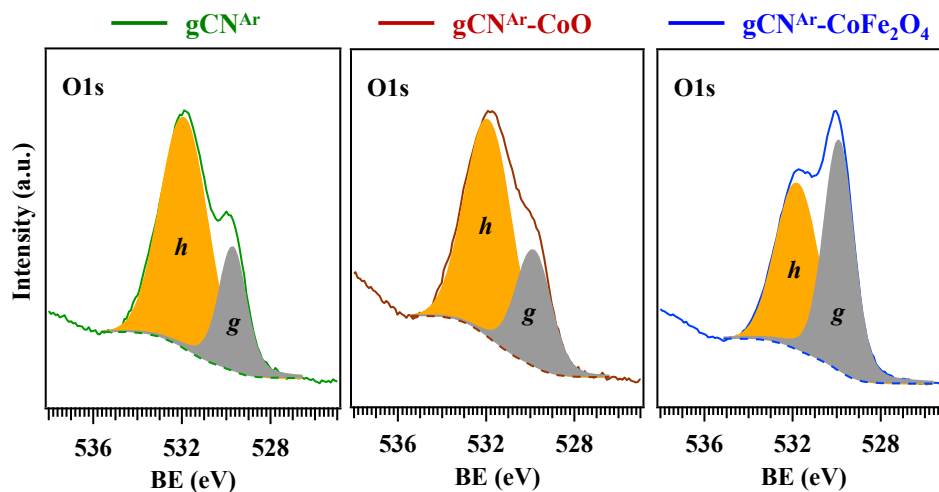

**Figure S9.** O1s photopeaks for gCN deposits supported on Ni foams before and after functionalization with CoO and CoFe<sub>2</sub>O<sub>4</sub>.

The O1s peak could be fitted by two bands (Figure S9): *g*, centered at BE = 529.8 eV, related to NiO from the Ni foam substrate [21], as well as to oxygen in CoO and CoFe<sub>2</sub>O<sub>4</sub> networks, for functionalized specimens [22-26]; *h*, centered at BE = 531.9 eV, assigned to -OH groups chemisorbed onto N vacancies [5,7,14,16,26,27]. The percentage contribution of bands *g* (*h*) to the overall O1s signal were 26.9% (73.1%), for gCN<sup>Ar</sup>; 30.5% (69.5%), for gCN<sup>Ar</sup>-CoO; 52.1% (47.9%), for gCN<sup>Ar</sup>-CoFe<sub>2</sub>O<sub>4</sub>.

### S3. Functional tests

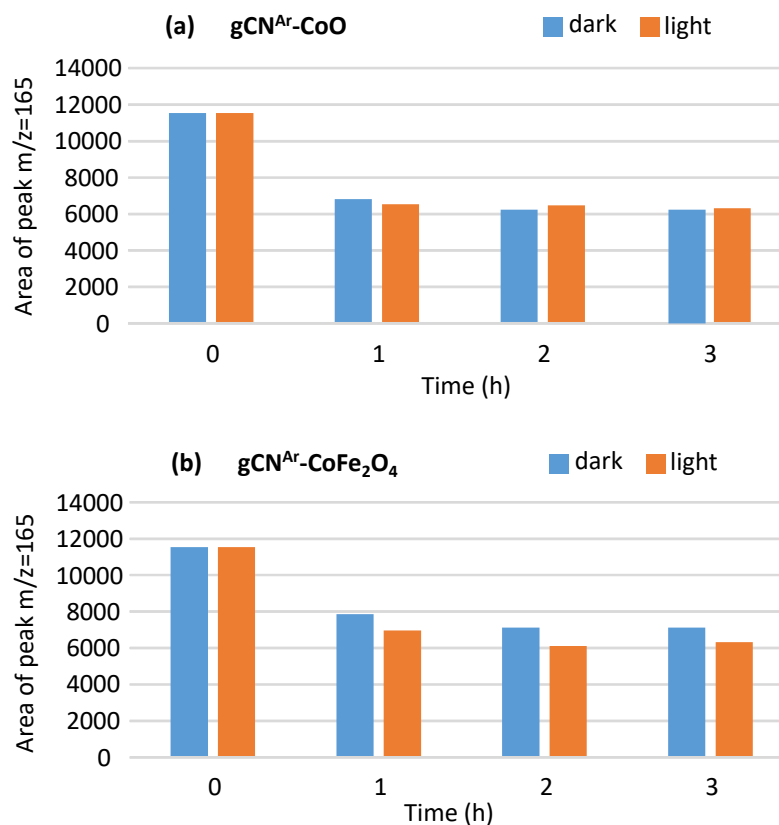

**Figure S10.** Determination of potassium hydrogen phthalate (KHP) concentration *vs.* time for (a)  $gCN^{Ar}-CoO$  and (b)  $gCN^{Ar}-CoFe_2O_4$ . Quantification of KHP was carried out by measuring the  $m/z = 165$  peak area by flow injection analysis - electrospray mass spectrometry (FIA-ESI/MS). Both samples showed a comparable degradation efficiency in the dark and under illumination, in line with their modest photoactivity (see the main paper text).



## References

1. Benedet, M.; Rizzi, G.A.; Gasparotto, A.; Gauquelin, N.; Orekhov, A.; Verbeeck, J.; Maccato, C.; Barreca, D. Functionalization of carbon nitride systems by cobalt and cobalt-iron oxides boosts solar water oxidation performances. *Appl. Surf. Sci.* **2023**, *618*, 156652. <https://doi.org/10.1016/j.apsusc.2023.156652>.
2. de la Peña, F.; et al. HyperSpy v.1.1.2 (2016). Available online: <https://hyperspy.org>. <https://doi.org/10.5281/zenodo.60697>.
3. Stadelmann, P.A. JEMS—EMS java version, 2004.
4. Niu, P.; Yin, L.-C.; Yang, Y.-Q.; Liu, G.; Cheng, H.-M. Increasing the visible light absorption of graphitic carbon nitride (Melon) photocatalysts by homogeneous self-modification with nitrogen vacancies. *Adv. Mater.* **2014**, *26*, 8046-8052. <https://doi.org/10.1002/adma.201404057>.
5. Guo, X.; Duan, J.; Wang, W.; Zhang, Z. Modified graphitic carbon nitride as the photocatalyst for wastewater treatment under visible light irradiation. *Fuel* **2020**, *280*, 118544. <https://doi.org/10.1016/j.fuel.2020.118544>.
6. Dong, F.; Wang, Z.; Li, Y.; Ho, W.-K.; Lee, S.C. Immobilization of polymeric g-C<sub>3</sub>N<sub>4</sub> on structured ceramic foam for efficient Visible light photocatalytic air purification with real indoor illumination. *Environ. Sci. Technol.* **2014**, *48*, 10345-10353. <https://doi.org/10.1021/es502290f>.
7. Zhu, Q.; Qiu, B.; Du, M.; Ji, J.; Nasir, M.; Xing, M.; Zhang, J. Dopant-induced edge and basal plane catalytic sites on ultrathin C<sub>3</sub>N<sub>4</sub> nanosheets for photocatalytic water reduction. *ACS Sustainable Chem. Eng.* **2020**, *8*, 7497-7502. <https://doi.org/10.1021/acssuschemeng.0c02122>.
8. Liang, Q.; Li, Z.; Huang, Z.-H.; Kang, F.; Yang, Q.-H. Holey graphitic carbon nitride nanosheets with carbon vacancies for highly improved photocatalytic hydrogen production. *Adv. Funct. Mater.* **2015**, *25*, 6885-6892. <https://doi.org/10.1002/adfm.201503221>.
9. Li, Y.; Wang, R.; Li, H.; Wei, X.; Feng, J.; Liu, K.; Dang, Y.; Zhou, A. Efficient and stable photoelectrochemical seawater splitting with TiO<sub>2</sub>@g-C<sub>3</sub>N<sub>4</sub> nanorod arrays decorated by Co-Pi. *J. Phys. Chem. C* **2015**, *119*, 20283-20292. <https://doi.org/10.1021/acs.jpcc.5b05427>.
10. Nasri, A.; Jaleh, B.; Nezafat, Z.; Nasrollahzadeh, M.; Azizian, S.; Jang, H.W.; Shokouhimehr, M. Fabrication of g-C<sub>3</sub>N<sub>4</sub>/Au nanocomposite using laser ablation and its application as an effective catalyst in the reduction of organic pollutants in water. *Ceram. Int.* **2021**, *47*, 3565-3572. <https://doi.org/10.1016/j.ceramint.2020.09.204>.
11. Morgan, D.J. Core-level reference spectra for bulk graphitic carbon nitride (g-C<sub>3</sub>N<sub>4</sub>). *Surf. Sci. Spectra* **2021**, *28*, 014007. <https://doi.org/10.1116/6.0001083>.
12. Kim, C.; Cho, K.M.; Park, K.; Kim, K.H.; Gereige, I.; Jung, H.-T. Ternary hybrid aerogels of g-C<sub>3</sub>N<sub>4</sub>/α-Fe<sub>2</sub>O<sub>3</sub> on a 3D graphene network: an efficient and recyclable Z-scheme photocatalyst. *ChemPlusChem* **2020**, *85*, 169-175. <https://doi.org/10.1002/cplu.201900688>.
13. Miller, T.S.; Jorge, A.B.; Suter, T.M.; Sella, A.; Corà, F.; McMillan, P.F. Carbon nitrides: synthesis and characterization of a new class of functional materials. *Phys. Chem. Chem. Phys.* **2017**, *19*, 15613-15638. <https://doi.org/10.1039/C7CP02711G>.
14. Fu, J.; Zhu, B.; Jiang, C.; Cheng, B.; You, W.; Yu, J. Hierarchical porous O-doped g-C<sub>3</sub>N<sub>4</sub> with enhanced photocatalytic CO<sub>2</sub> reduction activity. *Small* **2017**, *13*, 1603938. <https://doi.org/10.1002/sml.201603938>.
15. Wang, J.; Zhang, W.-D. Modification of TiO<sub>2</sub> nanorod arrays by graphite-like C<sub>3</sub>N<sub>4</sub> with high visible light photoelectrochemical activity. *Electrochim. Acta* **2012**, *71*, 10-16. <https://doi.org/10.1016/j.electacta.2012.03.102>.
16. Yao, S.-Y.; Chang, K.-S. Solvothermal synthesis of various C<sub>3</sub>N<sub>4</sub> films on FTO substrates and their photocatalytic and sensing applications. *J. Am. Ceram. Soc.* **2021**, *104*, 722-732. <https://doi.org/10.1111/jace.17484>.
17. Peng, G.; Xing, L.; Barrio, J.; Volokh, M.; Shalom, M. A general synthesis of porous carbon nitride films with tunable surface area and photophysical properties. *Angew. Chem. Int. Ed.* **2018**, *57*, 1186-1192. <https://doi.org/10.1002/anie.201711669>.

18. Wei, F.; Liu, Y.; Zhao, H.; Ren, X.; Liu, J.; Hasan, T.; Chen, L.; Li, Y.; Su, B.-L. Oxygen self-doped g-C<sub>3</sub>N<sub>4</sub> with tunable electronic band structure for unprecedentedly enhanced photocatalytic performance. *Nanoscale* **2018**, *10*, 4515-4522. <https://doi.org/10.1039/C7NR09660G>.
19. Yu, H.; Shi, R.; Zhao, Y.; Bian, T.; Zhao, Y.; Zhou, C.; Waterhouse, G.I.N.; Wu, L.-Z.; Tung, C.-H.; Zhang, T. Alkali-assisted synthesis of nitrogen deficient graphitic carbon nitride with tunable band structures for efficient visible-light-driven hydrogen evolution. *Adv. Mater.* **2017**, *29*, 1605148. <https://doi.org/10.1002/adma.201605148>.
20. Ren, Y.; Feng, D.; Yan, Z.; Sun, Z.; Zhang, Z.; Xu, D.; Qiao, C.; Chen, Z.; Jia, Y.; Chan Jun, S.; et al. Interfacial coupled engineering of plasmonic amorphous MoO<sub>3-x</sub> nanodots/g-C<sub>3</sub>N<sub>4</sub> nanosheets for photocatalytic water splitting and photothermal conversion. *Chem. Eng. J.* **2023**, *453*, 139875. <https://doi.org/10.1016/j.cej.2022.139875>.
21. Available online: <http://srdata.nist.gov/xps>.
22. Chagas, C.A.; de Souza, E.F.; de Carvalho, M.C.N.A.; Martins, R.L.; Schmal, M. Cobalt ferrite nanoparticles for the preferential oxidation of CO. *Appl. Catal., A* **2016**, *519*, 139-145. <https://doi.org/10.1016/j.apcata.2016.03.024>.
23. Barreca, D.; Gasparotto, A.; Lebedev, O.I.; Maccato, C.; Pozza, A.; Tondello, E.; Turner, S.; Van Tendeloo, G. Controlled vapor-phase synthesis of cobalt oxide nanomaterials with tuned composition and spatial organization. *CrystEngComm* **2010**, *12*, 2185-2197. <https://doi.org/10.1039/B926368N>.
24. Guo, F.; Shi, W.; Wang, H.; Han, M.; Li, H.; Huang, H.; Liu, Y.; Kang, Z. Facile fabrication of a CoO/g-C<sub>3</sub>N<sub>4</sub> p-n heterojunction with enhanced photocatalytic activity and stability for tetracycline degradation under visible light. *Catal. Sci. Technol.* **2017**, *7*, 3325-3331. <https://doi.org/10.1039/C7CY00960G>.
25. Hu, F.; Luo, W.; Liu, C.; Dai, H.; Xu, X.; Yue, Q.; Xu, L.; Xu, G.; Jian, Y.; Peng, X. Fabrication of graphitic carbon nitride functionalized P-CoFe<sub>2</sub>O<sub>4</sub> for the removal of tetracycline under visible light: Optimization, degradation pathways and mechanism evaluation. *Chemosphere* **2021**, *274*, 129783. <https://doi.org/10.1016/j.chemosphere.2021.129783>.
26. Ismael, M.; Wark, M. Photocatalytic activity of CoFe<sub>2</sub>O<sub>4</sub>/g-C<sub>3</sub>N<sub>4</sub> nanocomposite toward degradation of different organic pollutants and their inactivity toward hydrogen production: The role of the conduction band position. *FlatChem* **2022**, *32*, 100337. <https://doi.org/10.1016/j.flatc.2022.100337>.
27. Benedet, M.; Rizzi, G.A.; Gasparotto, A.; Lebedev, O.I.; Girardi, L.; Maccato, C.; Barreca, D. Tailoring oxygen evolution performances of carbon nitride systems fabricated by electrophoresis through Ag and Au plasma functionalization. *Chem. Eng. J.* **2022**, *448*, 137645. <https://doi.org/10.1016/j.cej.2022.137645>.
